# Supplementary material for: Catalysing holistic wastewater treatment, electricity generation, and emerging contaminant removal in a pre-pilot Fenton-microbial fuel cell
Source: Royal Society of Chemistry journal article supplement (doi:10.1039/d4ta09278c), 2025-01-01
Supplement: d4ta09278c1.pdf [file d4ta09278c1.pdf]

## **Catalysing Holistic Wastewater Treatment, Electricity Generation, and Emerging Contaminant Removal in a Pre-pilot Fenton-microbial Fuel Cell**

Anil Dhanda <sup>a</sup>, Lakshmi Pathi Thulluru <sup>b</sup>, Rishabh Raj <sup>b</sup>, Rajarshi Bhar <sup>a</sup>, Shamik Chowdhury <sup>b</sup>, Saikat Kumar Kuila <sup>a,c</sup>, Brajesh K. Dubey <sup>a, b</sup>, Makarand M. Ghangrekar <sup>a, d\*</sup>

<sup>a</sup> Department of Civil Engineering, Indian Institute of Technology Kharagpur, Kharagpur, West Bengal 721302, India.

<sup>b</sup> School of Environmental Science and Engineering, Indian Institute of Technology Kharagpur, Kharagpur, West Bengal 721302, India.

<sup>c</sup> Department of Metallurgical and Materials Engineering, Indian Institute of Technology Kharagpur, West Bengal, India-721302

<sup>d</sup> Director, National Institute of Technology Puducherry, Karaikal, 609609, India

\*Corresponding author email – [ghangrekar@civil.iitkgp.ac.in](mailto:ghangrekar@civil.iitkgp.ac.in)

### **Supplementary Materials**

#### **List of captions**

**Text S1.** Instrumental Characterisation

**Text S2** Environmental footprint assessment

**Text S2.1** Methodology

**Text S2.1.1** Goal and scope

**Text S2.1.2** Life Cycle Inventory

**Fig. S1** Field emission scanning electron microscope image of synthesised Co<sub>3</sub>O<sub>4</sub> catalyst

**Fig S2** Linear sweep voltammetry plot for rGO-Co<sub>3</sub>O<sub>4</sub> catalyst.

**Fig S3** Mass spectra chromatograms of the catholyte sample at different time intervals

**Table S1** LCI of material synthesis and construction components of the reactor.

**Table S2** LCI of the chemicals and energy requirement during the operational phase of the wastewater treatment.

**Table S3** Identified degradation by-products using MALDI-TOF analysis

**Table S4** Results of uncertainty analysis for 10000 simulations and a confidence interval of 95%

**Table S5** Composition of synthetic wastewater used as anolyte

### **Text S1. Instrumental Characterisation**

The electrochemical characterisations, including cyclic voltammetry (CV), electrochemical impedance spectroscopy (EIS), and linear sweep voltammetry (LSV), were performed using a Metrohm, Autolab: PGSTAT 204 workstation with a three-electrode setup. The as-obtained rGO-Co<sub>3</sub>O<sub>4</sub> was coated over a 2 cm × 2 cm carbon felt, acting as a working electrode with a catalyst loading of 2 mg/cm<sup>2</sup>. The Pt plate acted as the counter electrode, whereas the Ag/AgCl (0.198 V vs standard hydrogen electrode (SHE)) served as a reference electrode. The CV and LSV analysis were carried out by varying the potential range from −1 V to +1 V at a scan rate of 25 mV/s. The EIS was performed by fluctuating the frequency from 100 mHz to 1 MHz. The CV, LSV, and EIS measurements were performed in a 50 mM Na<sub>2</sub>SO<sub>4</sub> electrolyte and O<sub>2</sub>-saturated environment. The rotating ring disk electrode (RRDE) experiment was performed at varying scan rates (400 – 2400 rpm) in a potential range of 0 to 1.2 V (vs RHE) in 0.1 M KOH electrolyte to calculate the number of electrons (*n*) transferred during the ORR. The precise value of *n* and H<sub>2</sub>O<sub>2</sub> selectivity of the catalyst was estimated using Eq. 1 and Eq. 2.

$$n = 4 \times \frac{I_d}{I_d + \frac{I_r}{N}} \quad (1)$$

$$H_2O_2 \text{ selectivity (\%)} = 200 \times \frac{\frac{I_r}{N}}{I_d + \frac{I_r}{N}} \quad (2)$$

Where,  $I_d$  represents disk current,  $I_r$  denotes ring current and  $N$  is the current collection efficiency of the Pt ring on the RRDE electrode.

The physicochemical features of the synthesised catalyst were examined *via* X-ray diffraction (XRD, Panalytical X'pert Pro), field emission-scanning electron microscope (FE-SEM), surface area and porosity analysis, Fourier transform infrared (FTIR) spectroscopy (Spectrum Rx, PerkinElmer, Inc., USA), and X-ray photoelectron spectroscopy (XPS) using XRD Panalytical X'pert pro, Spectrum Rx (PerkinElmer, Inc., USA), ZEISS EVO 60 Carl ZEISS SMT Germany, BELSORP-mini II Japan, and, VG ESCA 220i-XL (Thermo VG Scientific Ltd., UK) instruments, respectively. Reactive oxygen species production in the cathodic chamber was confirmed using room-temperature pulsed electron paramagnetic resonance (EPR) spectroscopy (Bruker, ELEXSYS 580, USA). The remnants produced from the breakdown of Congo red were examined using matrix-assisted laser desorption ionisation time-of-flight mass spectrometry (MALDI-TOF-MS) technology from Applied Biosystems Inc., based in CA, USA.

## **Text S2 Environmental footprint assessment**

### **Text S2.1 Methodology**

#### **Text S2.1.1 Goal and scope**

The primary objective of the life cycle analysis (LCA) was to estimate the gate-to-gate environmental impact of contaminant removal from water and chemical oxygen demand (COD) removal from synthetic wastewater employing the reactor fabricated and operated in IIT Kharagpur (West Bengal, India). The methodology was based on recommendations provided in ISO 14040 and ISO 14044<sup>1, 2</sup>. The geographical scope of the study is limited to

India and the temporal scope of 2023 to 2024. The system boundary includes both the construction and operational phases, considering two different scenarios, namely, Congo red (CR) removal from 20 ppm aqueous solution (P1) and wastewater treatment by first anodic degradation followed by cathodic degradation (P2). Accordingly, a functional unit of one gram of CR removal and one gram of COD removal was adopted for assessing and comparing P1 and P2, respectively. ReCiPe 2016 (H) was adopted as a life cycle impact assessment methodology for estimating the footprint in SimaPro v9.4.0.2, with midpoint and endpoint normalization performed based on World (2010) H and World (2010) H/H approach.

### **Text S2.1.2 Life Cycle Inventory**

The life cycle inventory (LCI) consisted of the material required for reactor fabrication, along with the energy and chemicals consumed during the electrode synthesis and operation phase (Table S1 and Table S2). The primary data of the LCI was compiled from the lab-scale study, and the background data was adopted from the EcoInvent v3.8 database. Some of the major assumptions considered while compiling the LCI are as follows:

1. The life of all the construction materials (i.e., ceramic membrane, stainless steel, carbon felt, steel wire, and glass hollow tube) has been considered as two years.
2. The electricity consumption during aeration was  $0.20 \text{ kWh/m}^3$ .
3. Due to the absence of  $\text{CoCl}_2$  in the EcoInvent v3 database, stoichiometrically equivalent amounts of  $\text{Co(OH)}_2$  and  $\text{HCl}$  were considered to account environmental impact of  $\text{CoCl}_2$ .
4. The wastewater treated in the anodic chamber in case P1 was treated as avoided wastewater treatment, considering the process proxy of “Wastewater, from residue {RoW} treatment of, capacity 1.1E10l/year | Cut-off, U” and considering an equivalent volume of wastewater treated. Specifically, the wastewater dataset in the Ecoinvent database has an influent COD

concentration of 155.6 ppm. The equivalent volume of wastewater treated was calculated by converting the influent wastewater with a COD concentration of 3000 ppm.

**Table S1** LCI of material synthesis and construction components of the reactor.

| Phase                                          | Inputs                               |      |        | Outputs                                      |      |       |
|------------------------------------------------|--------------------------------------|------|--------|----------------------------------------------|------|-------|
|                                                | Field                                | Unit | Value  | Field                                        | Unit | Value |
| GO preparation                                 | Graphite powder                      | g    | 2.00   | GO                                           | g    | 3     |
|                                                | KMnO <sub>4</sub>                    | g    | 8.00   |                                              |      |       |
|                                                | H <sub>2</sub> SO <sub>4</sub>       | g    | 92.00  |                                              |      |       |
|                                                | H <sub>2</sub> O <sub>2</sub>        | g    | 2.18   |                                              |      |       |
|                                                | DI water                             | kg   | 19.50  |                                              |      |       |
|                                                | Electricity (centrifugation)         | kWh  | 0.90   |                                              |      |       |
|                                                | Electricity (magnetic stirrer)       | kWh  | 0.03   |                                              |      |       |
|                                                | Electricity (Oven drying)            | kWh  | 1.80   |                                              |      |       |
| rGO-Co <sub>3</sub> O <sub>4</sub> preparation | GO                                   | g    | 0.08   | rGO-Co <sub>3</sub> O <sub>4</sub> composite | g    | 0.35  |
|                                                | CoCl <sub>2</sub> .6H <sub>2</sub> O | g    | 0.43   |                                              |      |       |
|                                                | NaHCO <sub>3</sub>                   | g    | 0.30   |                                              |      |       |
|                                                | H <sub>2</sub> O <sub>2</sub>        | g    | 2.18   |                                              |      |       |
|                                                | DI water                             | kg   | 0.09   |                                              |      |       |
|                                                | Electricity (magnetic stirrer)       | Wh   | 0.85   |                                              |      |       |
|                                                | CO <sub>2</sub> sparging             | g    | 594.00 |                                              |      |       |
|                                                | N <sub>2</sub> H <sub>4</sub>        | mg   | 102.00 |                                              |      |       |
|                                                | Electricity (magnetic stirrer)       | kWh  | 0.96   |                                              |      |       |
|                                                | Hydrothermal treatment               | kWh  | 2.40   |                                              |      |       |
|                                                | Electricity (Oven drying)            | kWh  | 1.80   |                                              |      |       |
| Cathode                                        | Carbon felt                          | g    | 9.60   |                                              |      |       |
|                                                | Ceramic membrane                     | kg   | 1.35   |                                              |      |       |
|                                                | Stainless steel mesh                 | g    | 95.16  |                                              |      |       |
|                                                | Steel wire                           | g    | 0.60   |                                              |      |       |
| Anode                                          | Carbon felt                          | g    | 32.64  |                                              |      |       |
|                                                | Steel wire                           | g    | 2.20   |                                              |      |       |
| Central support                                | Glass hollow tube                    | g    | 15.00  |                                              |      |       |

**Table S2** LCI of the chemicals and energy requirement during the operational phase of the wastewater treatment.

| Phase                | Inputs                               |      |        | Outputs                |      |        |
|----------------------|--------------------------------------|------|--------|------------------------|------|--------|
|                      | Field                                | Unit | Value  | Field                  | Unit | Value  |
| Operation phase (P1) | Influent Congo Red (P1)              | g    | 210.24 | Effluent Congo Red     | g    | 0.54   |
|                      | FeSO <sub>4</sub> ·7H <sub>2</sub> O | g    | 981.12 | Electricity generation | Wh   | 33.67  |
|                      | H <sub>2</sub> SO <sub>4</sub>       | kg   | 1.26   |                        |      |        |
|                      | Electricity (aeration) for 72 h      | Wh   | 74.66  |                        |      |        |
|                      | rGO-Co <sub>3</sub> O <sub>4</sub>   | g    | 224.64 |                        |      |        |
|                      | Carbon black                         | g    | 56.16  |                        |      |        |
|                      | PDMS                                 | kg   | 1.45   |                        |      |        |
| Operation phase (P2) | Influent COD                         | g    | 730.00 | Effluent COD           | g    | 39.42  |
|                      | FeSO <sub>4</sub> ·7H <sub>2</sub> O | g    | 62.22  | Electricity generation | Wh   | 135.29 |
|                      | H <sub>2</sub> SO <sub>4</sub>       | g    | 43.80  |                        |      |        |
|                      | Electricity (aeration) for 72 h      | Wh   | 74.66  |                        |      |        |
|                      | rGO-Co <sub>3</sub> O <sub>4</sub>   | g    | 7.79   |                        |      |        |
|                      | Carbon black                         | g    | 1.95   |                        |      |        |
|                      | PDMS                                 | g    | 50.29  |                        |      |        |

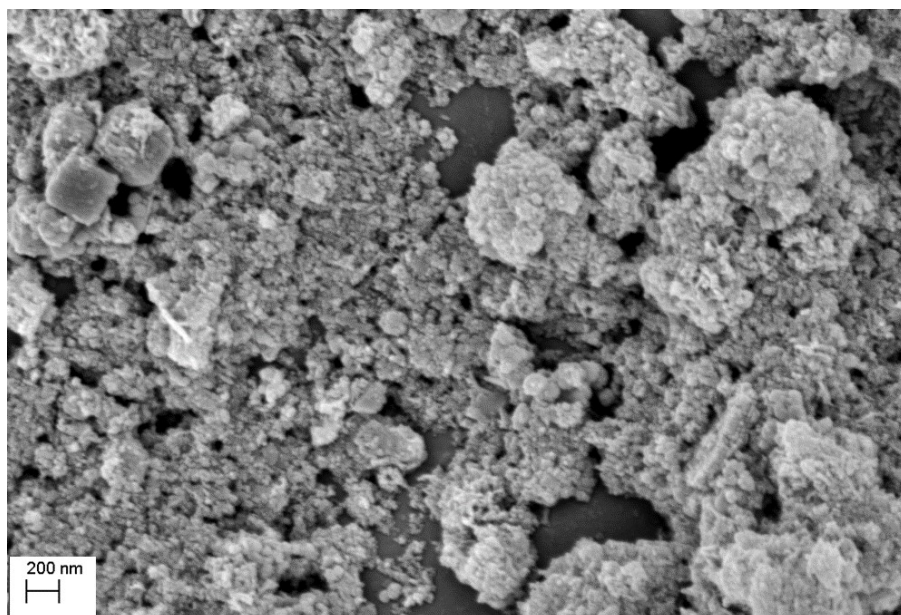

**Fig. S1** Field emission scanning electron microscope image of synthesised  $\text{Co}_3\text{O}_4$  catalyst

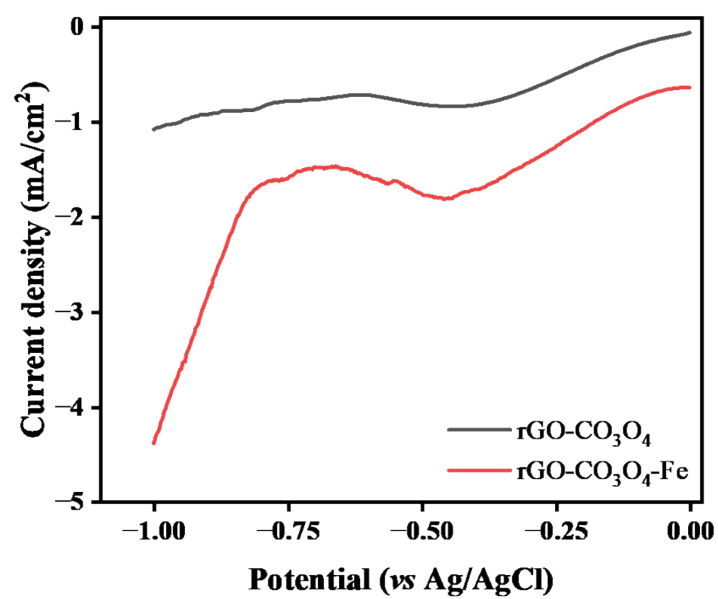

**Fig S2** Linear sweep voltammetry plot for rGO- $\text{Co}_3\text{O}_4$  catalyst.

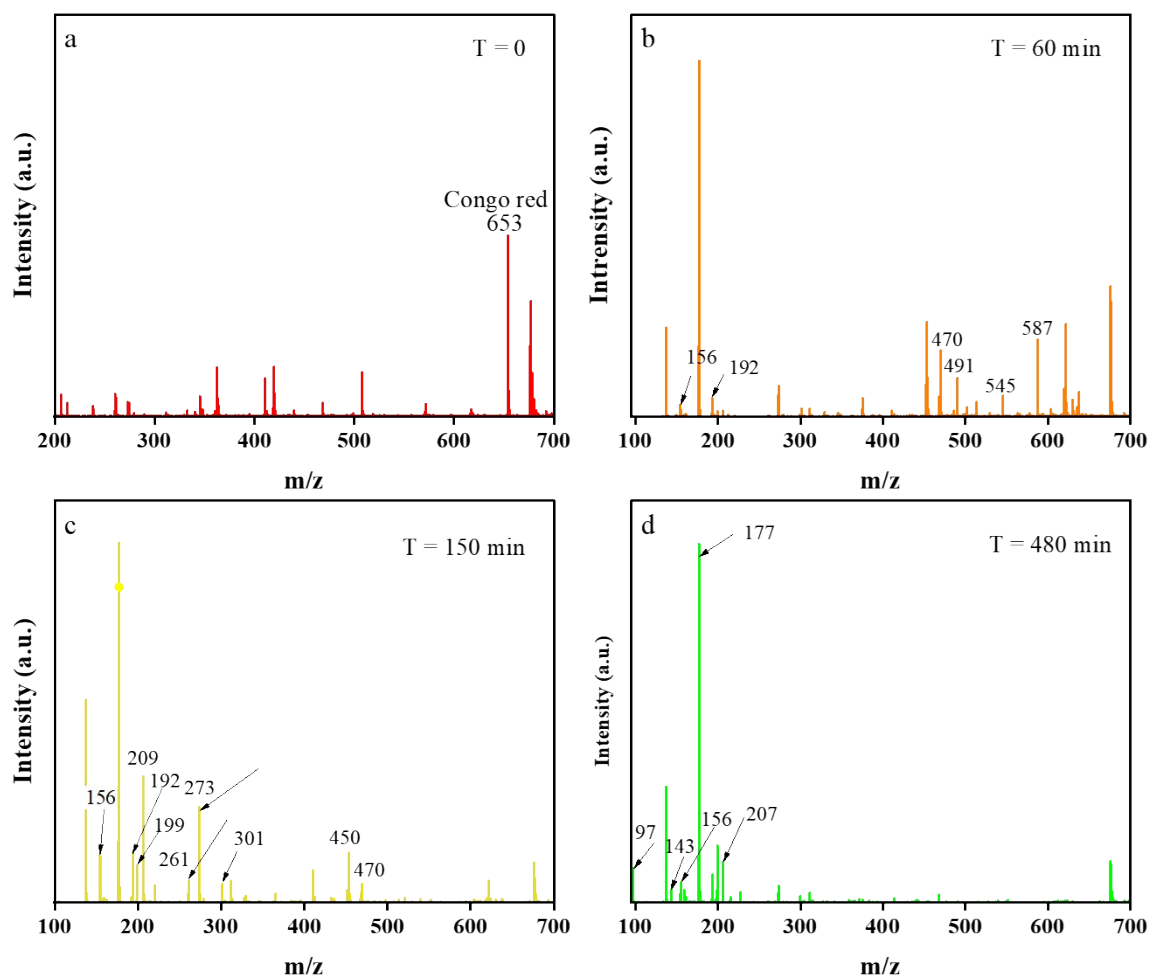

**Fig. S3** Mass spectra chromatograms of the catholyte sample at different time intervals

**Table S3** Identified degradation by-products using MALDI-TOF analysis

| DB | m/z | Chemical str.                                                                       | DB | m/z   | Chemical str.                                                                         |
|----|-----|-------------------------------------------------------------------------------------|----|-------|---------------------------------------------------------------------------------------|
| 0  |     | 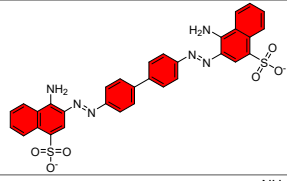   | 8  | 261   | 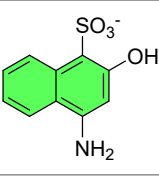   |
| 1  | 587 | 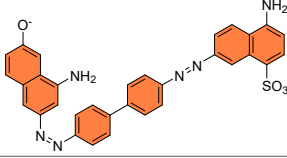   | 9  | 209   | 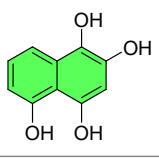   |
| 2  | 545 | 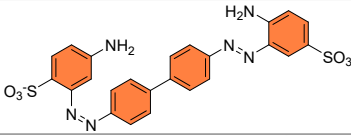   | 10 | 199   | 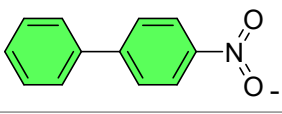   |
| 3  | 491 | 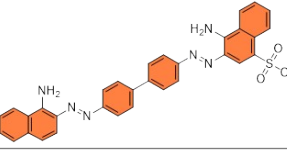   | 11 | 192   | 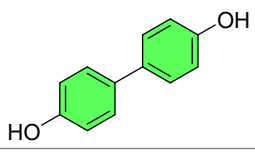   |
| 4  | 470 | 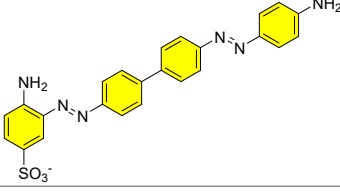  | 12 | 177   | 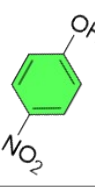  |
| 5  | 450 | 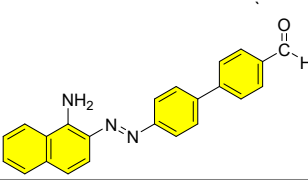 | 13 | 156   | 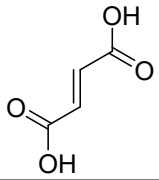 |
| 6  | 301 | 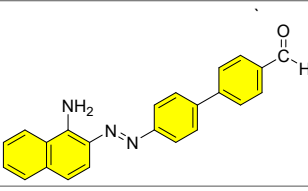 | 14 | 97/99 | 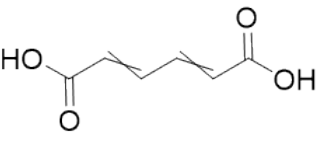  |
| 7  | 273 | 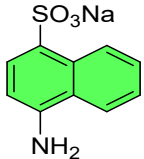 |    |       |                                                                                       |

**Table S4** Results of uncertainty analysis for 10000 simulations and a confidence interval of 95%

| Impact category                         | Unit                  | Scenario P1 |          |          |        | Scenario P2 |          |          |        |
|-----------------------------------------|-----------------------|-------------|----------|----------|--------|-------------|----------|----------|--------|
|                                         |                       | Mean        | Median   | SD       | CV (%) | Mean        | Median   | SD       | CV (%) |
| Fine particulate matter formation       | kg PM2.5 eq           | 7.36E-02    | 7.10E-02 | 1.92E-02 | 26.12  | 6.88E-04    | 6.64E-04 | 1.76E-04 | 25.61  |
| Fossil resource scarcity                | kg oil eq             | 7.67E+00    | 7.40E+00 | 2.04E+00 | 26.56  | 7.17E-02    | 6.92E-02 | 1.88E-02 | 26.23  |
| Freshwater eutrophication               | kg P eq               | 1.41E-02    | 1.11E-02 | 1.09E-02 | 77.36  | 1.33E-04    | 1.04E-04 | 1.04E-04 | 78.26  |
| Global warming                          | kg CO <sub>2</sub> eq | 3.06E+01    | 2.95E+01 | 7.54E+00 | 24.67  | 2.86E-01    | 2.77E-01 | 6.90E-02 | 24.12  |
| Human carcinogenic toxicity             | kg 1,4-DCB            | 1.10E+00    | 6.09E-01 | 2.85E+00 | 260.12 | 1.08E-02    | 5.66E-03 | 2.66E-02 | 247.64 |
| Ozone formation, Human health           | kg NO <sub>x</sub> eq | 6.11E-02    | 5.90E-02 | 1.56E-02 | 25.5   | 5.72E-04    | 5.53E-04 | 1.44E-04 | 25.18  |
| Ozone formation, Terrestrial ecosystems | kg NO <sub>x</sub> eq | 6.15E-02    | 5.94E-02 | 1.57E-02 | 25.5   | 5.75E-04    | 5.57E-04 | 1.45E-04 | 25.18  |
| Terrestrial acidification               | kg SO <sub>2</sub> eq | 9.22E-02    | 8.76E-02 | 2.79E-02 | 30.26  | 8.62E-04    | 8.21E-04 | 2.53E-04 | 29.36  |
| Terrestrial ecotoxicity                 | kg 1,4-DCB            | 1.74E+01    | 1.67E+01 | 4.91E+00 | 28.27  | 1.64E-01    | 1.56E-01 | 4.61E-02 | 28.16  |

**Table S5** Composition of synthetic wastewater used as anolyte

| Compounds                            | Weight (g) per litre |
|--------------------------------------|----------------------|
| Sucrose                              | 2.7                  |
| NaHCO <sub>3</sub>                   | 4.5                  |
| NH <sub>4</sub> Cl                   | 0.95                 |
| K <sub>2</sub> HPO <sub>4</sub>      | 0.08                 |
| KH <sub>2</sub> PO <sub>4</sub>      | 0.03                 |
| MgSO <sub>4</sub> .7H <sub>2</sub> O | 0.19                 |
| FeSO <sub>4</sub> .7H <sub>2</sub> O | 0.06                 |
| CaCl <sub>2</sub> .2H <sub>2</sub> O | 0.75                 |
| Trace Metal solution                 | 1.50 mL              |

## References

1. I. Standard, *Environmental management-Life cycle assessment-Requirements and guidelines*, ISO, 2006.
2. E. Iso, *Environmental management—Life cycle assessment—Requirements and guidelines*, 2006, 1-46.
3. Y. Yang, X. Li, X. Yang and Z. He, *RSC Advances*, 2016, **6**, 49787-49791.
